# Supplementary material for: New Library of Iodo-Quinoline Derivatives Obtained by an Alternative Synthetic Pathway and Their Antimicrobial Activity
Source: MDPI journal article supplement (doi:10.3390/molecules29040772), 2024-02-07
Supplement: s1 [file s1]

## Supporting Information

### **New library of Iodo-quinoline derivatives obtained by an alternative synthetic pathway and their antimicrobial activity.**

Cristina M. Al-Matarneh<sup>1,2\*</sup>, Alina Nicolescu<sup>3</sup>, Ioana C. Marinas<sup>2</sup>, Madalina D. Gaboreanu<sup>2</sup>, Sergiu Shova<sup>4</sup>, Andrei Dascalu<sup>1</sup>, Mihaela Sillion<sup>5</sup>, Mariana Pinteala<sup>1</sup>

<sup>1</sup>Center of Advanced Research in Bionanoconjugates and Biopolymers, "Petru Poni"  
Institute of Macromolecular Chemistry of Romanian Academy, 41A Grigore  
Ghica Voda Alley, Iasi 700487, Romania;

<sup>2</sup>Research Institute of the University of Bucharest-ICUB, 91-95 Spl.  
Independentei, 050095 Bucharest, Romania;

<sup>3</sup>NMR Laboratory "Petru Poni" Institute of Macromolecular Chemistry of Romanian  
Academy, 41A Grigore Ghica Voda Alley, Iasi 700487, Romania;

<sup>4</sup>Department of Inorganic Polymers "Petru Poni" Institute of Macromolecular  
Chemistry of Romanian Academy, 41A Grigore Ghica Voda Alley, Iasi 700487,  
Romania;

<sup>5</sup>Physics of Polymers and Polymeric Materials Department, "Petru Poni" Institute  
of Macromolecular Chemistry, 41A Grigore Ghica Voda Alley, 700487, Iasi,  
Romania;

almarneh.cristina@icmpp.ro;

## Table of Contents

|                                                                                                                                                                                                                                                      |    |
|------------------------------------------------------------------------------------------------------------------------------------------------------------------------------------------------------------------------------------------------------|----|
| <b>Figure S1.A.</b> The $^1\text{H}$ -NMR spectrum corresponding to compound <b>4c</b> , recorded in DMSO- $\text{d}_6$ , at 400.1 MHz. ....                                                                                                         | 5  |
| <b>Figure S1.B.</b> The $^{13}\text{C}$ -NMR spectrum corresponding to compound <b>4c</b> , recorded in DMSO- $\text{d}_6$ , at 100.6 MHz. ....                                                                                                      | 5  |
| <b>Figure S1.C.</b> Detailed region of the $\text{H,C}$ -HSQC spectrum corresponding to compound <b>4c</b> , showing the correlation signals for protonated carbons. ....                                                                            | 6  |
| <b>Figure S1.D.</b> The $\text{H,C}$ -HMBC spectrum corresponding to compound <b>4c</b> , showing 2 or 3 bonds correlation signals between protons and carbons, used mainly to assign quaternary carbons.....                                        | 7  |
| <b>Figure S1.E.</b> MALDI-MS spectra of compound <b>4c</b> .....                                                                                                                                                                                     | 8  |
| <b>Figure S1.F.</b> FT-IR spectrum of compound <b>4c</b> . ....                                                                                                                                                                                      | 8  |
| <b>Figure S2.A.</b> The $^1\text{H}$ -NMR spectrum corresponding to compound <b>4t</b> , recorded in DMSO- $\text{d}_6$ , at 400.1 MHz. ....                                                                                                         | 9  |
| <b>Figure S2.B.</b> The $^{13}\text{C}$ -NMR spectrum corresponding to compound <b>4t</b> , recorded in DMSO- $\text{d}_6$ , at 100.6 MHz. ....                                                                                                      | 9  |
| <b>Figure S2.C.</b> MALDI-MS spectrum of the compound <b>4t</b> . ....                                                                                                                                                                               | 10 |
| <b>Figure S2.D.</b> FT-IR spectrum of compound <b>4t</b> . ....                                                                                                                                                                                      | 10 |
| <b>Figure S3.A.</b> The $^1\text{H}$ -NMR spectrum corresponding to compound <b>8c</b> , recorded in DMSO- $\text{d}_6$ , at 400.1 MHz. ....                                                                                                         | 11 |
| <b>Figure S3.B.</b> MALDI-MS spectra of compound <b>8c</b> .....                                                                                                                                                                                     | 11 |
| <b>Figure S3.C.</b> FT-IR spectrum of compound <b>8c</b> . ....                                                                                                                                                                                      | 12 |
| <b>Figure S4.A.</b> The $^1\text{H}$ -NMR spectrum corresponding to compound <b>5n</b> , recorded in DMSO- $\text{d}_6$ , at 400.1 MHz. ....                                                                                                         | 13 |
| <b>Figure S4.B.</b> The $^{13}\text{C}$ -NMR spectrum corresponding to compound <b>5n</b> , recorded in DMSO- $\text{d}_6$ , at 100.6 MHz. ....                                                                                                      | 14 |
| <b>Figure S4.C.</b> The $\text{H,C}$ -HMBC spectrum corresponding to compound <b>5n</b> , recorded in DMSO- $\text{d}_6$ , showing correlation signals between vinylic protons and either quinoline's CH-3 or benzaldehyde's C-14 carbon atoms. .... | 15 |
| <b>Figure S4.D.</b> Maldi-MS spectrum corresponding to compound <b>5n</b> .....                                                                                                                                                                      | 15 |
| <b>Figure S4.E.</b> FT-IR spectrum of compound <b>5n</b> . ....                                                                                                                                                                                      | 16 |
| <b>Figure S5.A.</b> The $^1\text{H}$ -NMR spectrum corresponding to compound <b>7</b> , recorded in DMSO- $\text{d}_6$ , at 600.1 MHz. ....                                                                                                          | 17 |

|                                                                                                                                                                       |    |
|-----------------------------------------------------------------------------------------------------------------------------------------------------------------------|----|
| <b>Figure S5.B.</b> The $^{13}\text{C}$ -NMR spectrum corresponding to compound <b>7</b> , recorded in DMSO- $\text{d}_6$ , at 150.9 MHz. ....                        | 18 |
| <b>Figure S5.C.</b> Maldi-MS spectrum corresponding to compound <b>7</b> .....                                                                                        | 18 |
| <b>Figure S5.D.</b> FT-IR spectrum of compound <b>7</b> .....                                                                                                         | 18 |
| <b>Figure S6.</b> View of the asymmetric unit (large atoms and bonds radii) showing its interaction with adjacent molecules for <b>4c</b> (a) and <b>4d</b> (b).....  | 19 |
| <b>Figure S7.</b> Crystal packing viewed along <i>b</i> axis for <b>4d</b> . ....                                                                                     | 20 |
| <b>Figure S8.</b> View of the asymmetric unit (large atoms and bonds radii) showing its interaction with adjacent molecules for <b>4b</b> (a) and <b>4e</b> (b). .... | 20 |
| <b>Figure S9.</b> Crystal packing viewed along <i>b</i> axis for compounds <b>4b</b> (a) and <b>4e</b> (b). ....                                                      | 21 |
| <b>Figure S10.</b> Powder XRD of compounds <b>4b</b> and <b>4c</b> .....                                                                                              | 22 |
| <b>Table S1.</b> Crystal data and details of structure refinement for <b>4b</b> , <b>4c</b> , <b>4d</b> and <b>4e</b> .....                                           | 23 |
| <b>Table S2.</b> Bond distances and angles for <b>4b</b> .....                                                                                                        | 23 |
| <b>Table S3.</b> Bond distances and angles for <b>4c</b> . ....                                                                                                       | 24 |
| <b>Table S4.</b> Bond distances and angles for <b>4d</b> . ....                                                                                                       | 25 |
| <b>Table S5.</b> Bond distances and angles for <b>4e</b> . ....                                                                                                       | 26 |

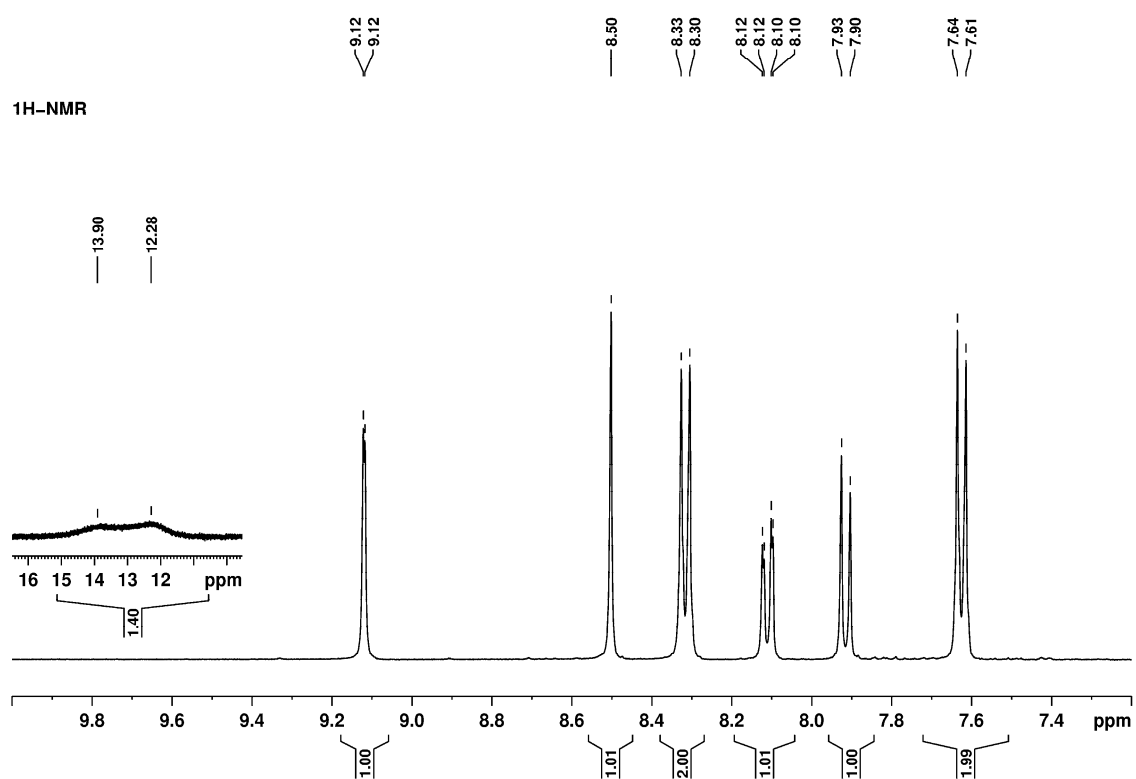

**Figure S1.A.** The <sup>1</sup>H-NMR spectrum corresponding to compound **4c**, recorded in DMSO-d<sub>6</sub>, at 400.1 MHz.

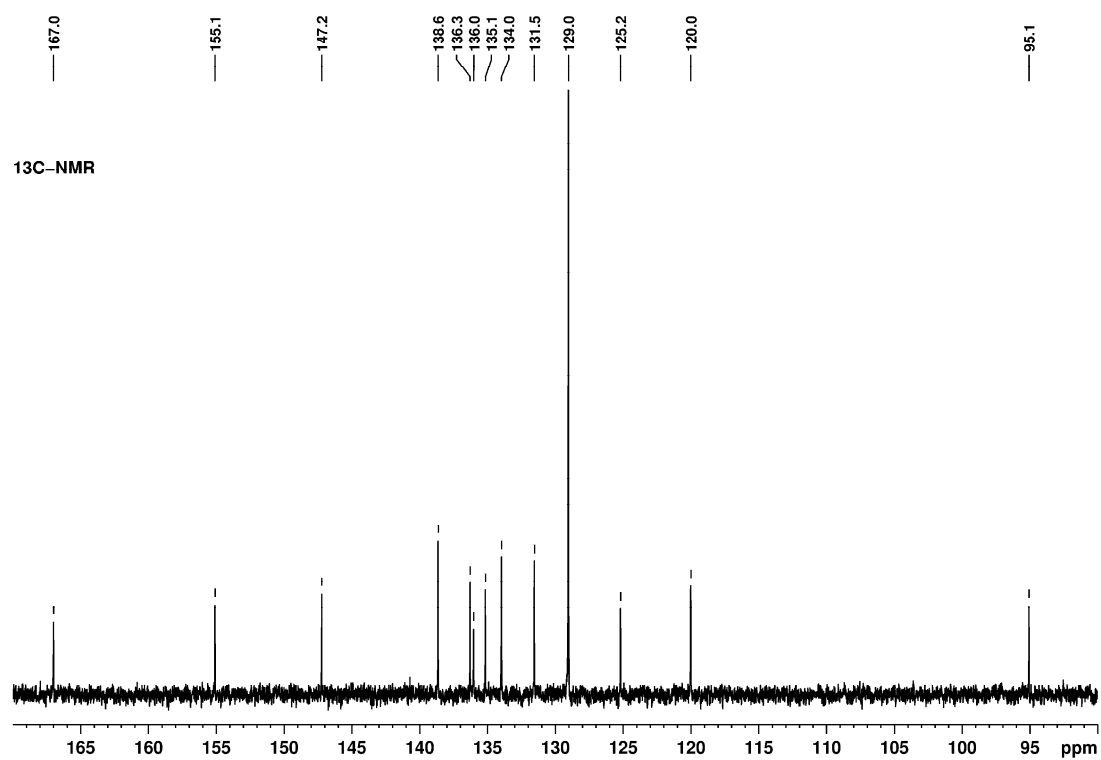

**Figure S1.B.** The <sup>13</sup>C-NMR spectrum corresponding to compound **4c**, recorded in DMSO-d<sub>6</sub>, at 100.6 MHz.

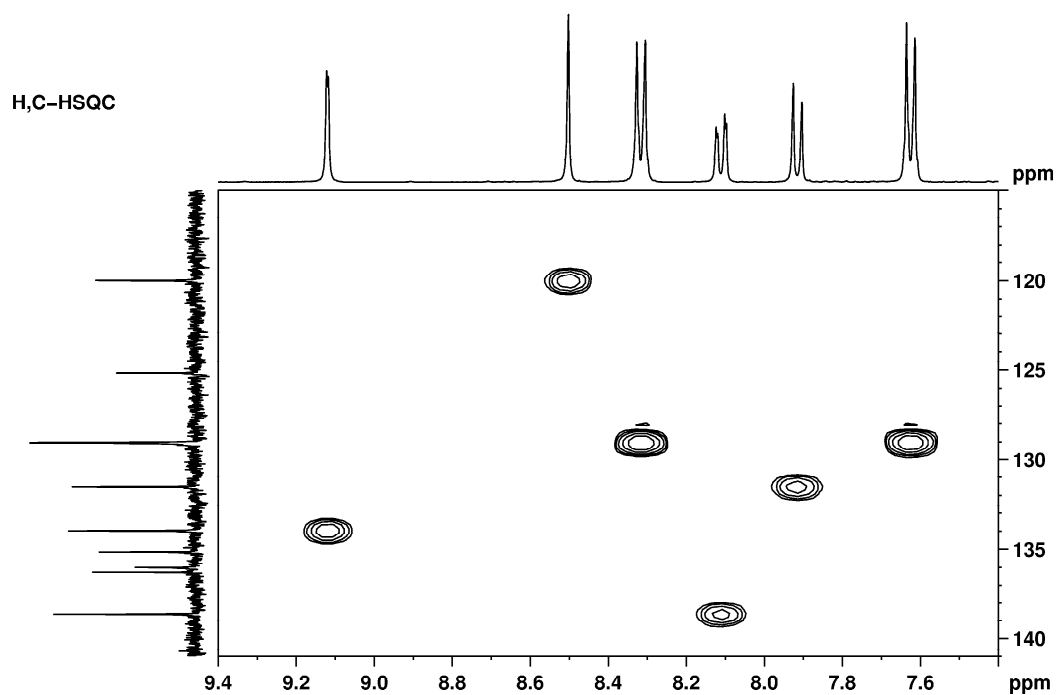

**Figure S1.C.** Detailed region of the H,C-HSQC spectrum corresponding to compound **4c**, showing the correlation signals for protonated carbons.

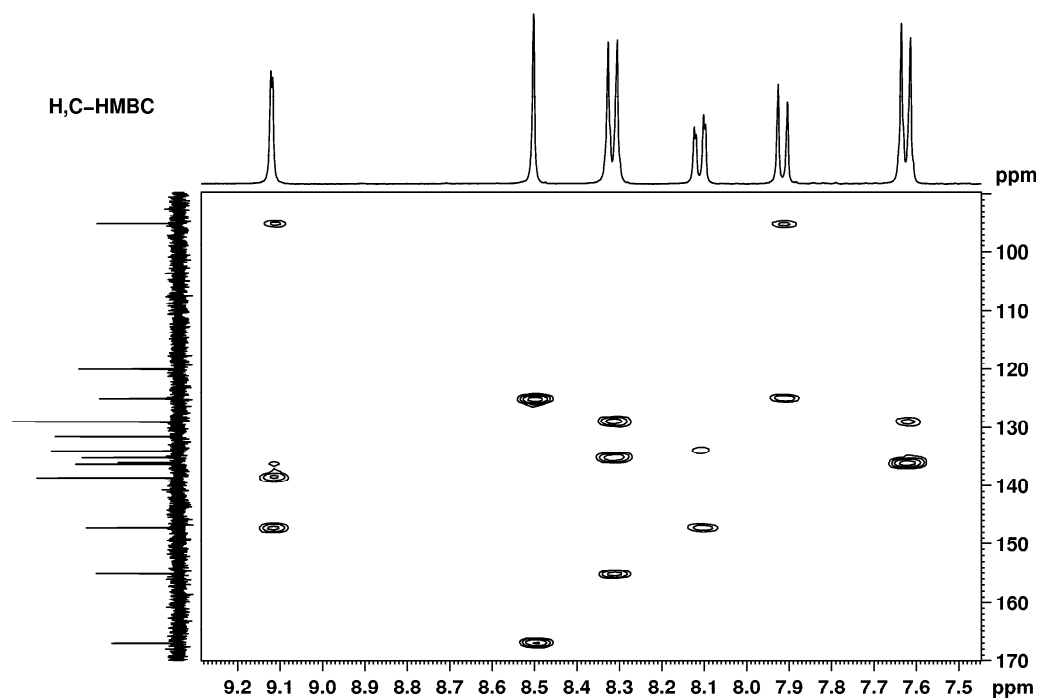

**Figure S1.D.** The H,C-HMBC spectrum corresponding to compound **4c**, showing 2 or 3 bonds correlation signals between protons and carbons, used mainly to assign quaternary carbons.

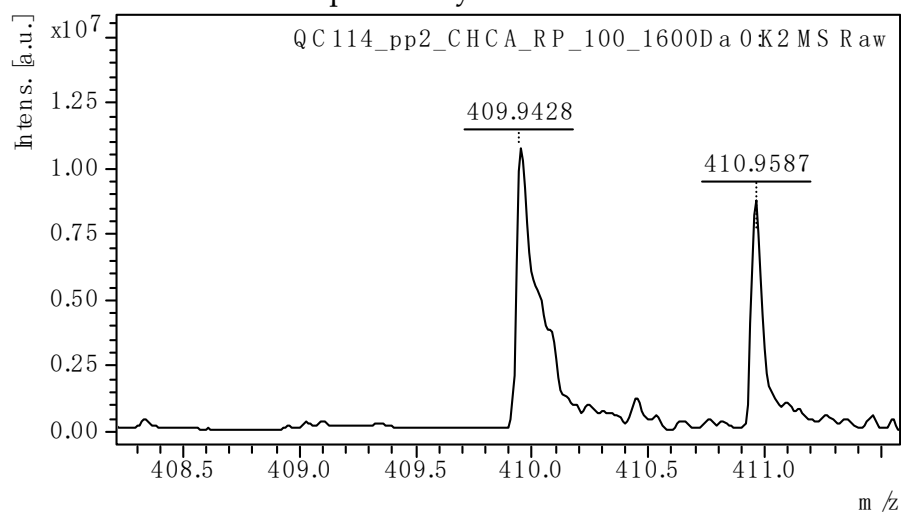

**Figure S1. E.** MALDI-MS spectra of compound **4c**.

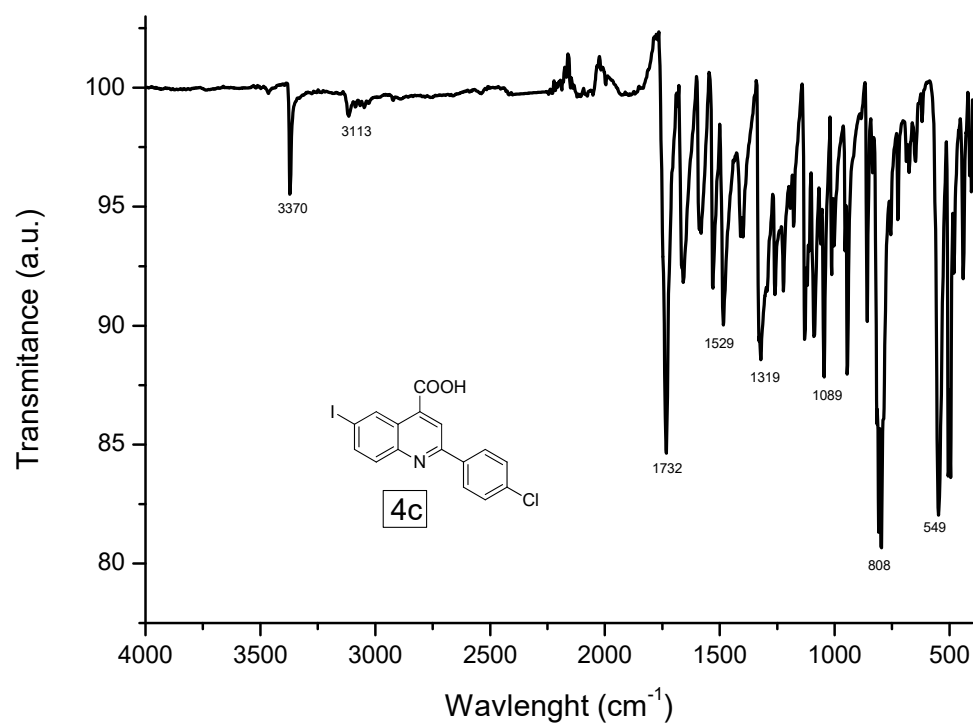

**Figure S1.F.** FT-IR spectrum of compound **4c**.

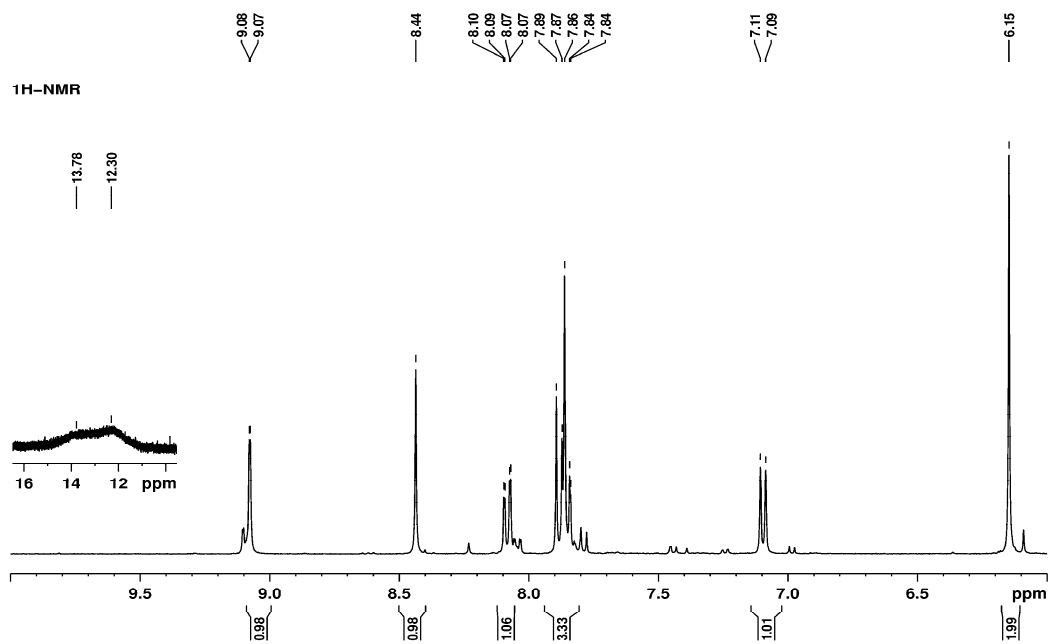

**Figure S2.A.** The <sup>1</sup>H-NMR spectrum corresponding to compound **4t**, recorded in DMSO-d<sub>6</sub>, at 400.1 MHz.

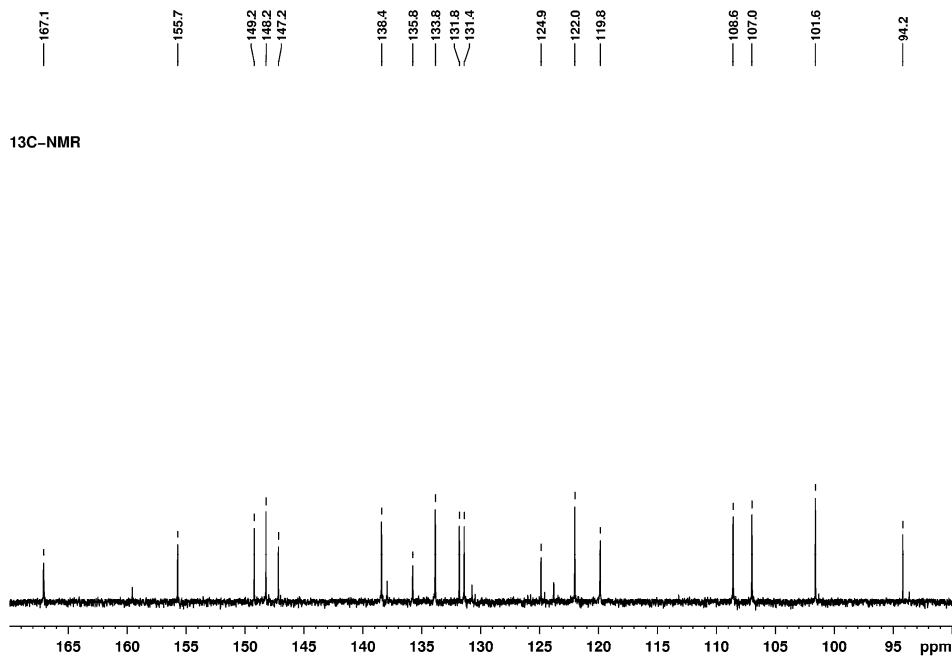

**Figure S2.B.** The <sup>13</sup>C-NMR spectrum corresponding to compound **4t**, recorded in DMSO-d<sub>6</sub>, at 100.6 MHz.

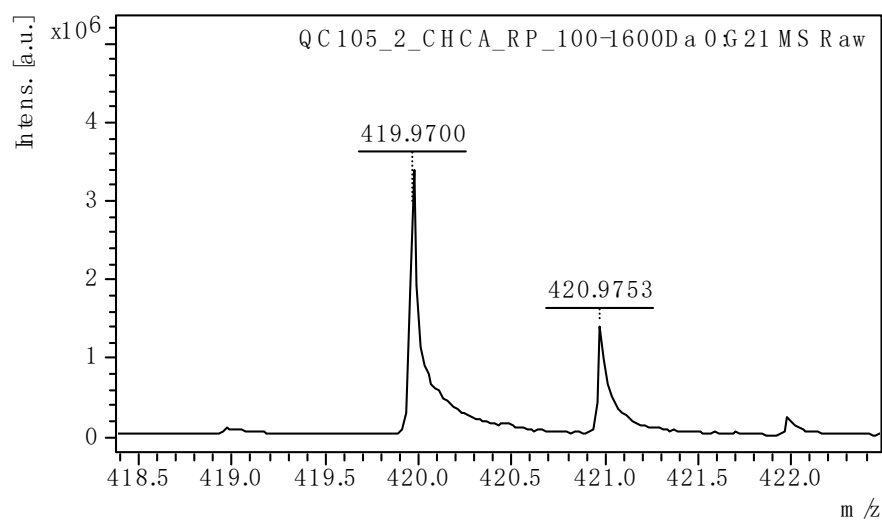

**Figure S2.C.** MALDI-MS spectrum of the compound **4t**.

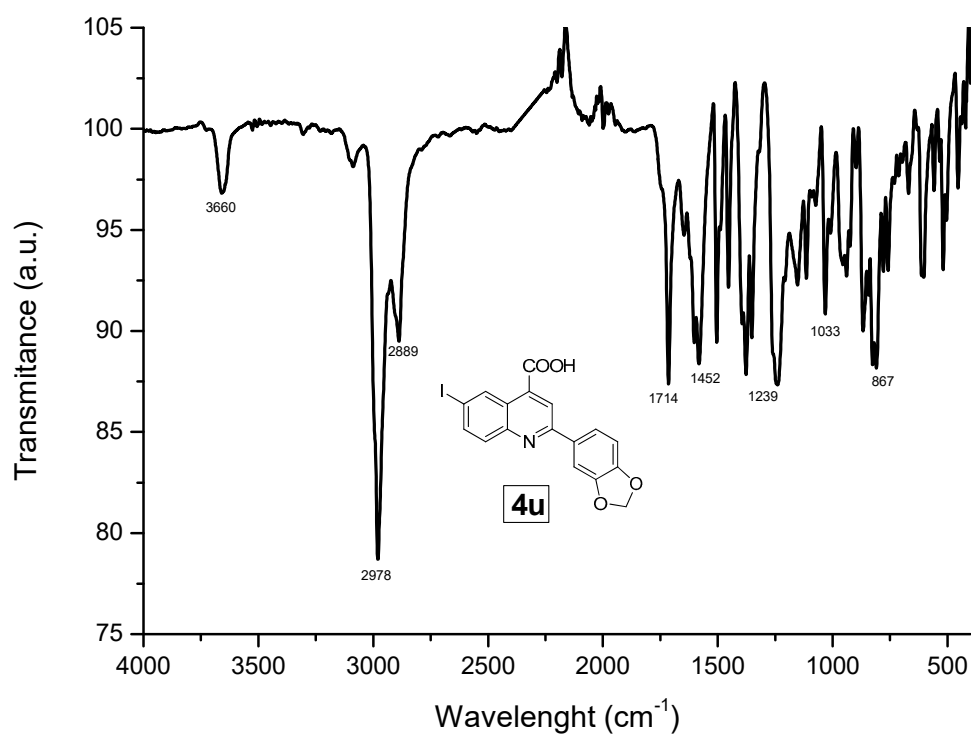

**Figure S2.D.** FT-IR spectrum of compound **4t**.

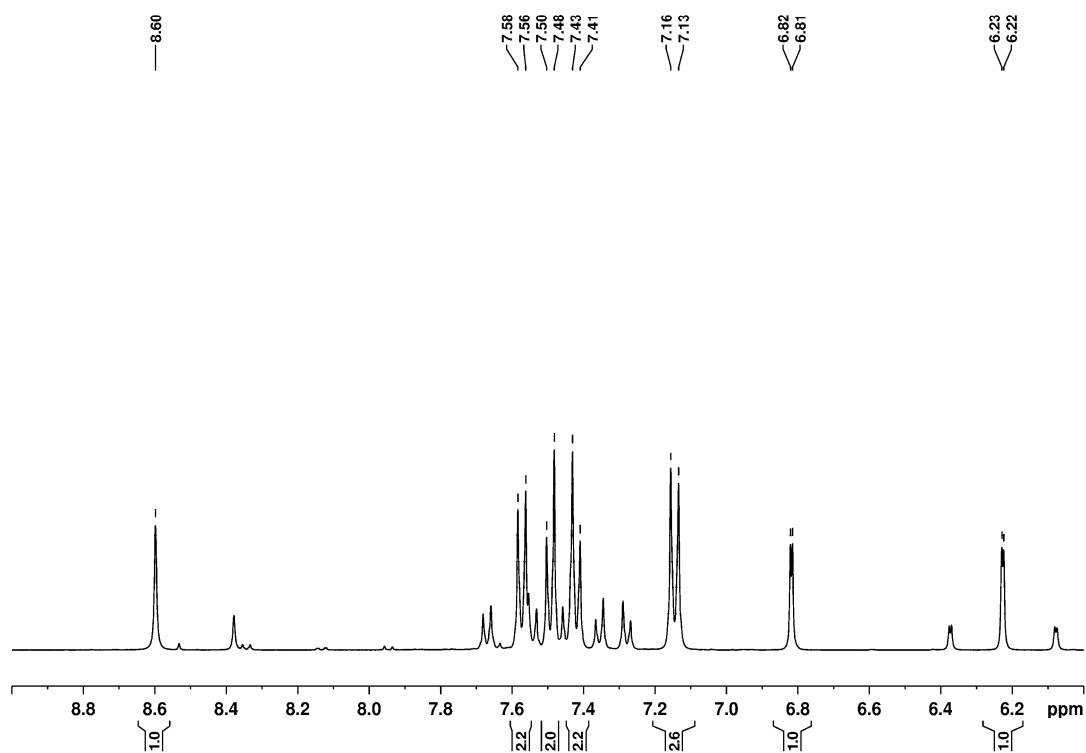

**Figure S3.A.** The  $^1\text{H}$ -NMR spectrum corresponding to compound **8c**, recorded in  $\text{DMSO-d}_6$ , at 400.1 MHz.

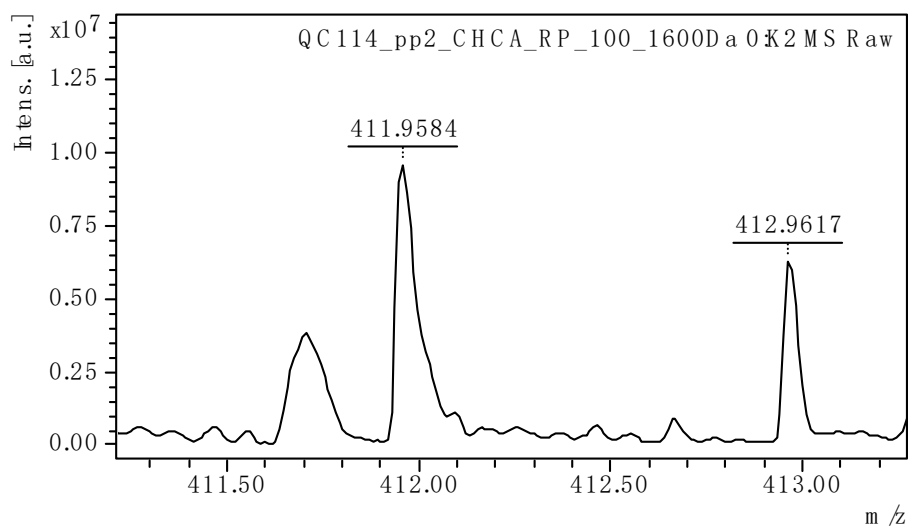

**Figure S3.B.** MALDI-MS spectra of compound **8c**.

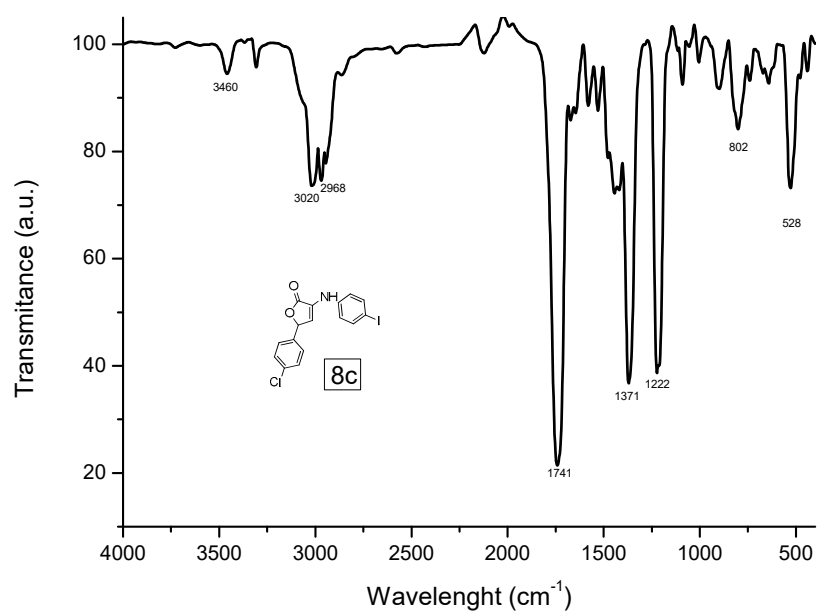

**Figure S3.C.** FT-IR spectrum of compound **8c**.

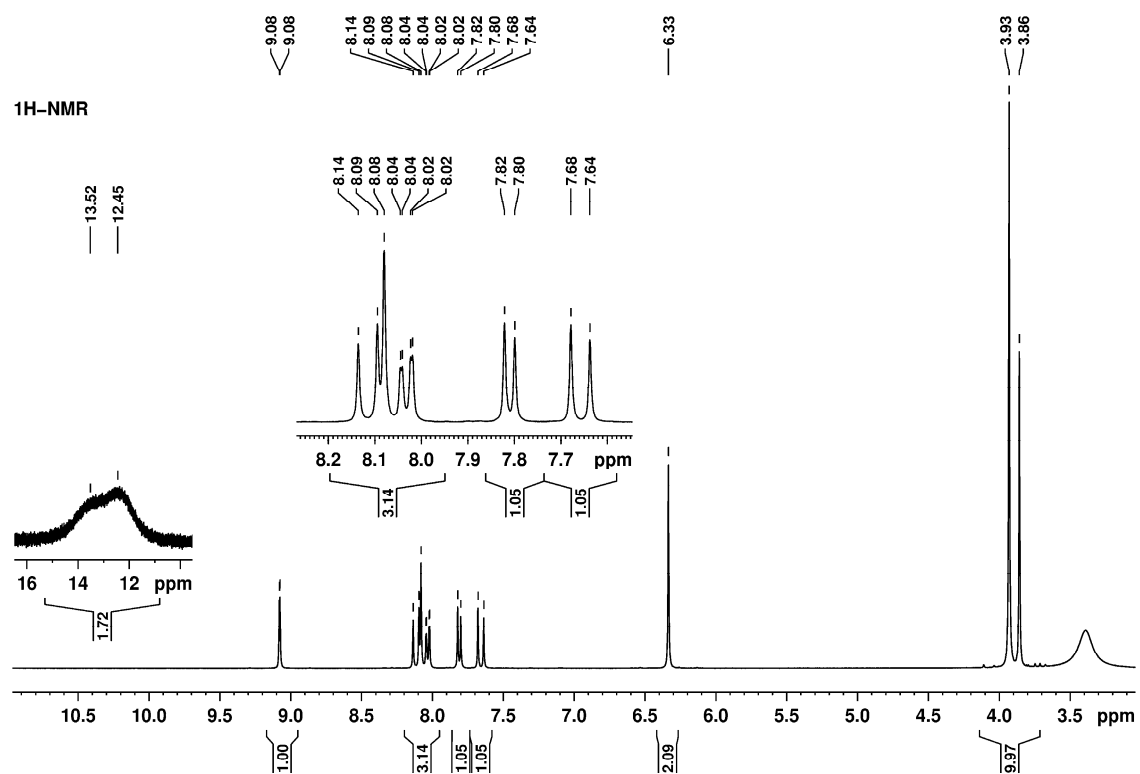

**Figure S4.A.** The <sup>1</sup>H-NMR spectrum corresponding to compound **5n**, recorded in DMSO-d<sub>6</sub>, at 400.1 MHz.

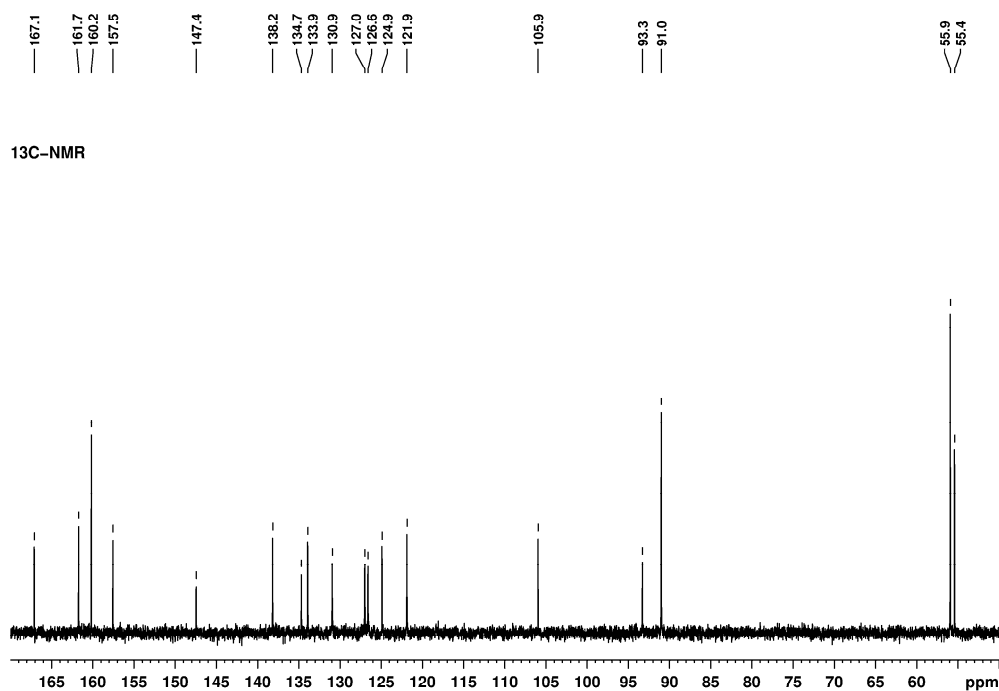

**Figure S4.B.** The <sup>13</sup>C-NMR spectrum corresponding to compound **5n**, recorded in DMSO-d<sub>6</sub>, at 100.6 MHz.

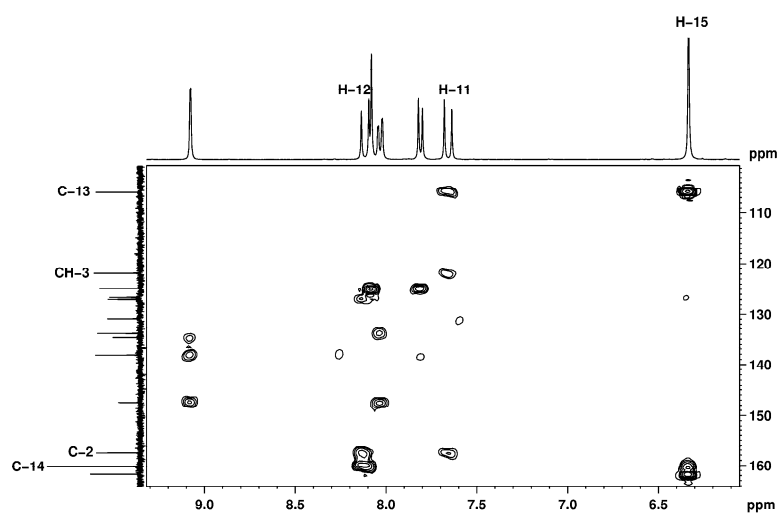

**Figure S4.C.** The H,C-HMBC spectrum corresponding to compound **5n**, recorded in DMSO-d<sub>6</sub>, showing correlation signals between vinylic protons and either quinoline's CH-3 or benzaldehyde's C-14 carbon atoms.

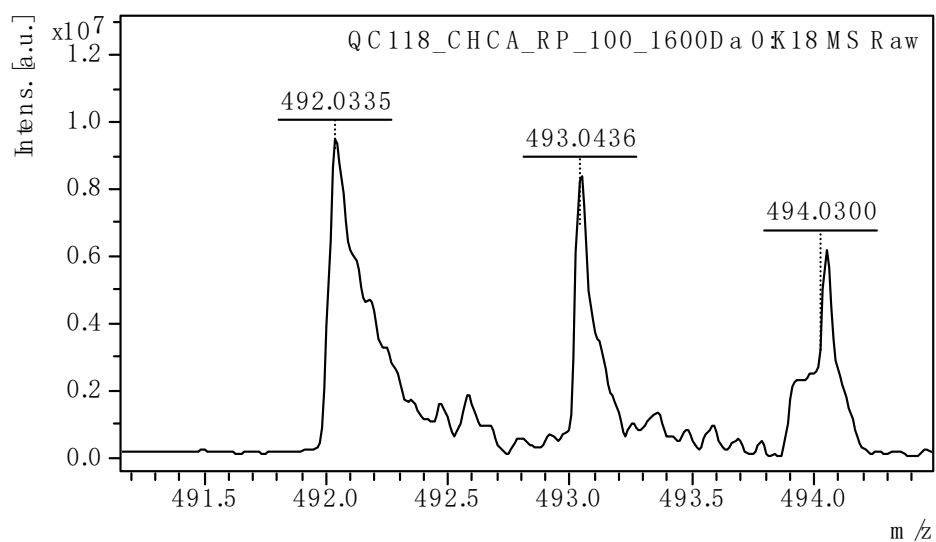

**Figure S4.D.** Maldi-MS spectrum corresponding to compound **5n**.

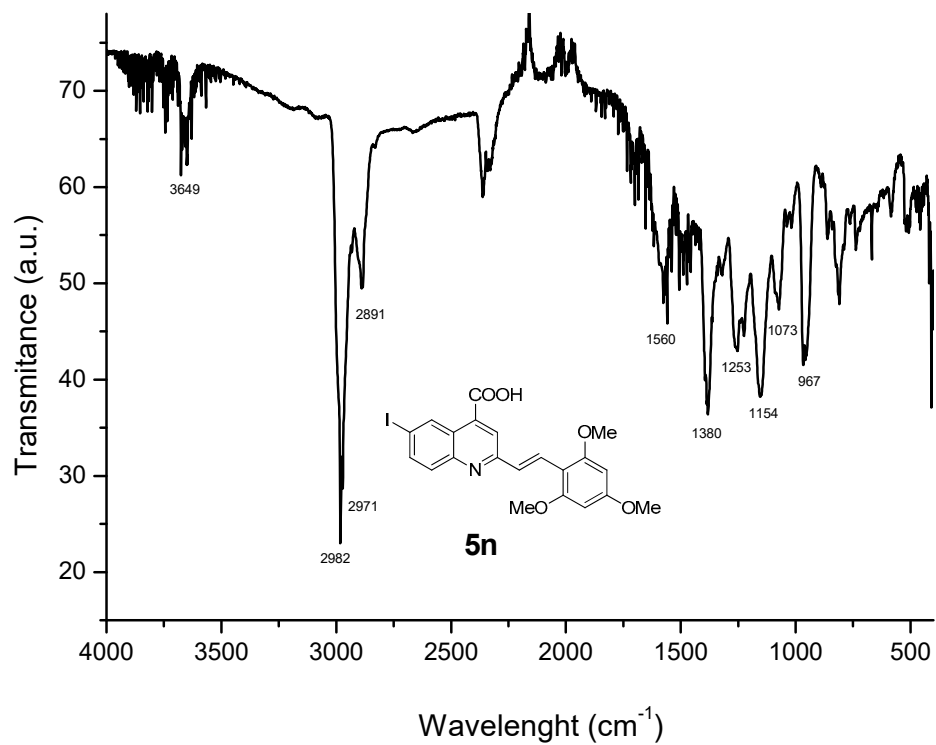

**Figure S4.E.** FT-IR spectrum of compound **5n**.

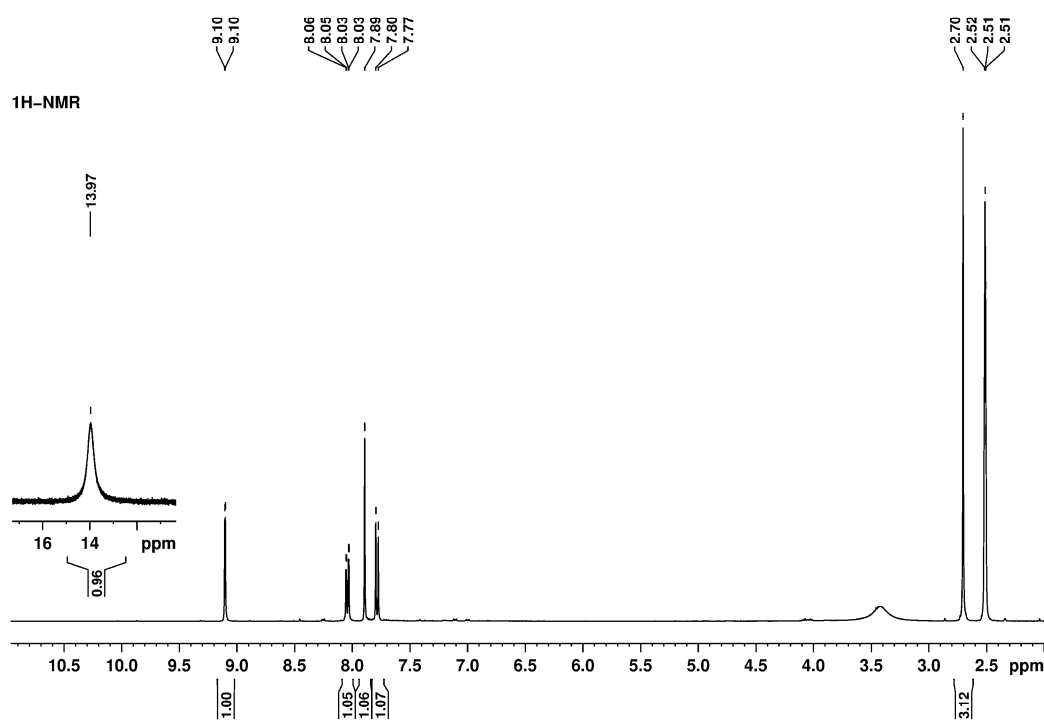

**Figure S5.A.** The  $^1\text{H}$ -NMR spectrum corresponding to compound **7**, recorded in  $\text{DMSO-d}_6$ , at 600.1 MHz.

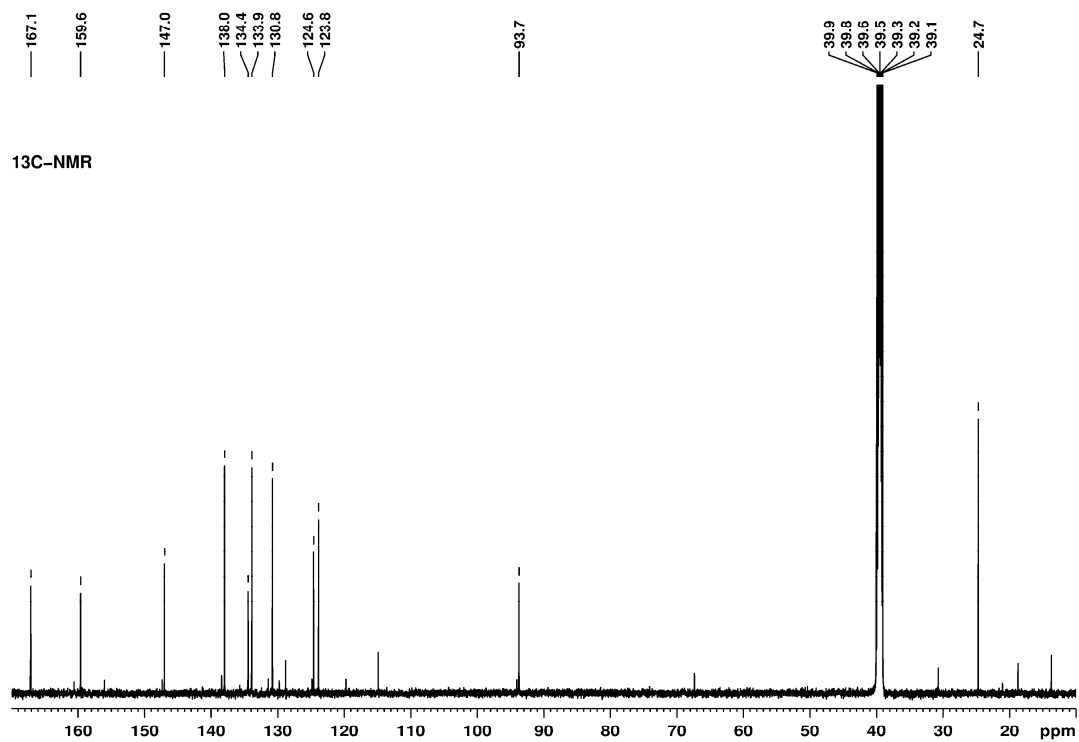

**Figure S5.B.** The <sup>13</sup>C-NMR spectrum corresponding to compound **7**, recorded in DMSO-d<sub>6</sub>, at 150.9 MHz.

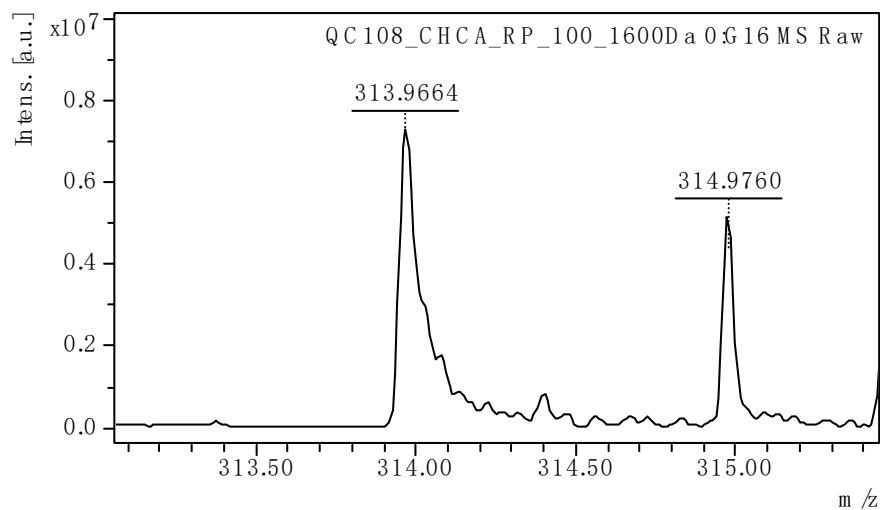

**Figure S5.C.** Maldi-MS spectrum corresponding to compound **7**.

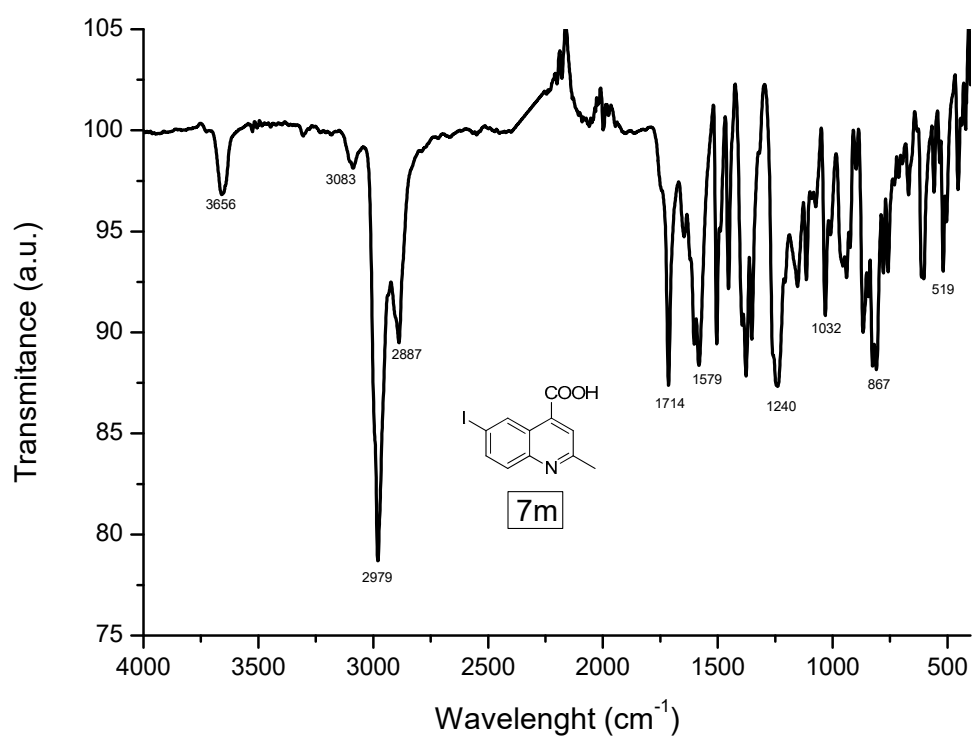

**Figure S5.D.** FT-IR spectrum of compound 7.

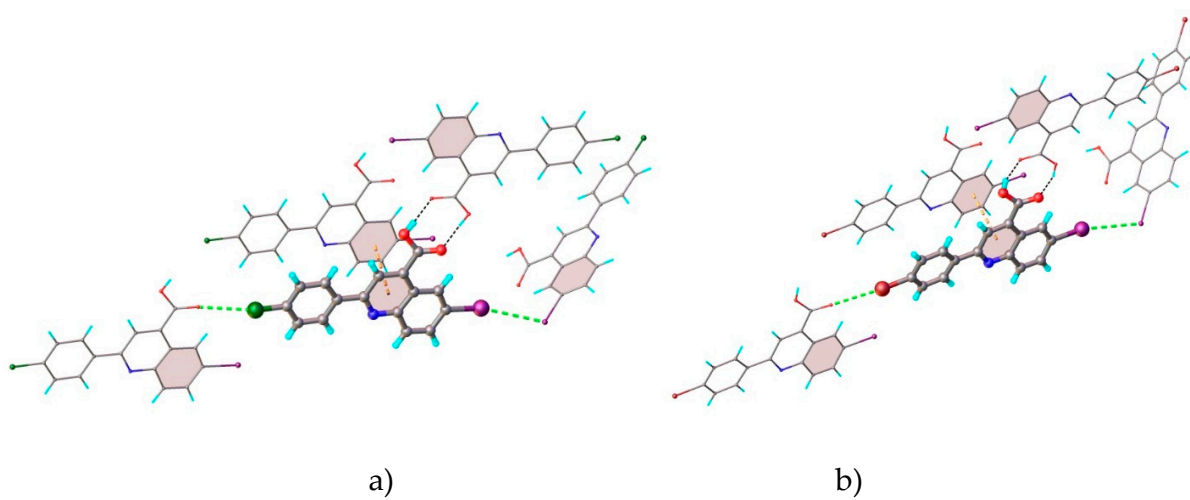

**Figure S6.** View of the asymmetric unit (large atoms and bonds radii) showing its interaction with adjacent molecules for **4c** (a) and **4d** (b). Hydrogen and halogen bonds are shown as dotted lines with black and green color, respectively.

H-bonds parameters:

For **4c**: O2-H...O1 [O2-H 0.84 Å, H...O1( $-x, -y, 1 - z$ ) 1.84 Å, O2...O1 2.683(3) Å,  $\angle$ O2HO1 177.2°.

For **4d**: O2-H...O1 [O2-H 0.86 Å, H...O1( $-x, -y, 1 - z$ ) 1.85 Å, O2...O1 2.674(6) Å,  $\angle$ O2HO1 160.6°.

For **4c**: [C14-Cl1...O1] C14-Cl1 1.744(1) Å, Cl1...O1( $1 - x, y - 1, z$ ) 3.211(1) Å,  $\angle$ C14Cl1O1 169.3(1)°.

Halogen bond parameters:

For **4d**: [C14-Br1...O1] C14-Br1 1.891(7) Å, Br1...O1( $1 - x, y - 1, z$ ) 3.314(5) Å,  $\angle$ C14Br1O1 162.2(4)°.

I...I contacts: 3.8052(1) (for **4c**) Å; 3.9115(8) Å (for **4d**);

Centroid-to-centroid distances (orange dotted lines): 3.5512 Å (for **4c**);  
3.5878(1) Å (for **4d**);

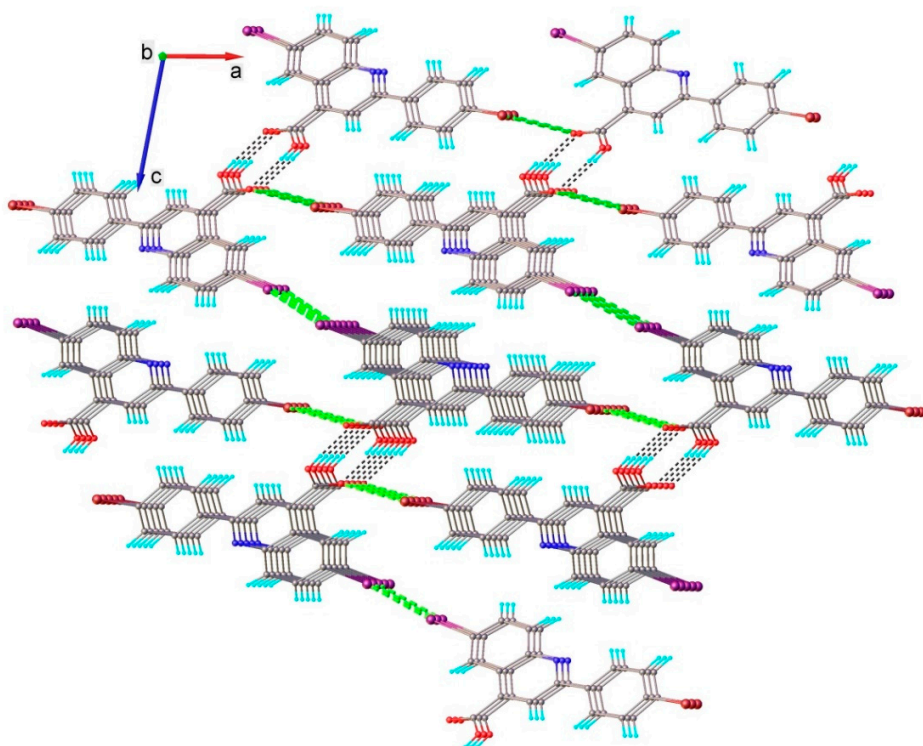

**Figure S7.** Crystal packing viewed along *b* axis for **4d**.
